# Supplementary material
Source: PubMed Central journal article supplement (PMC1783428)
Supplement: pnas_0609672104_3.pdf [file pnas_0609672104_3.pdf]

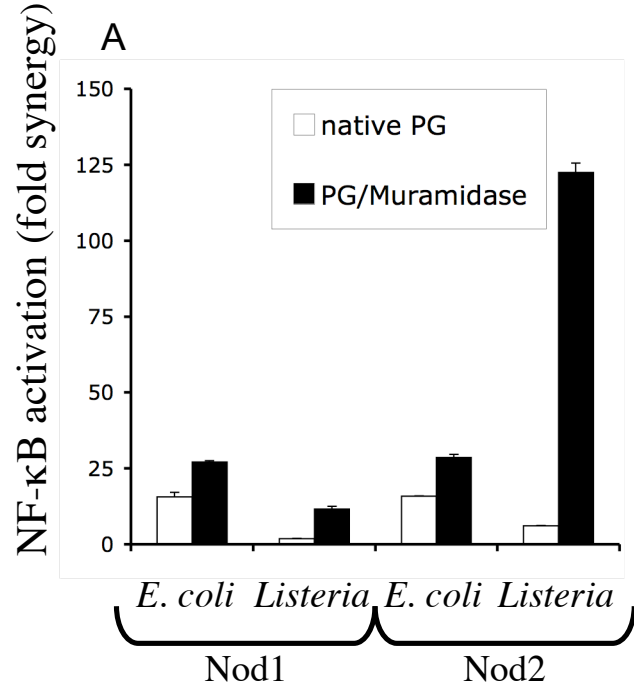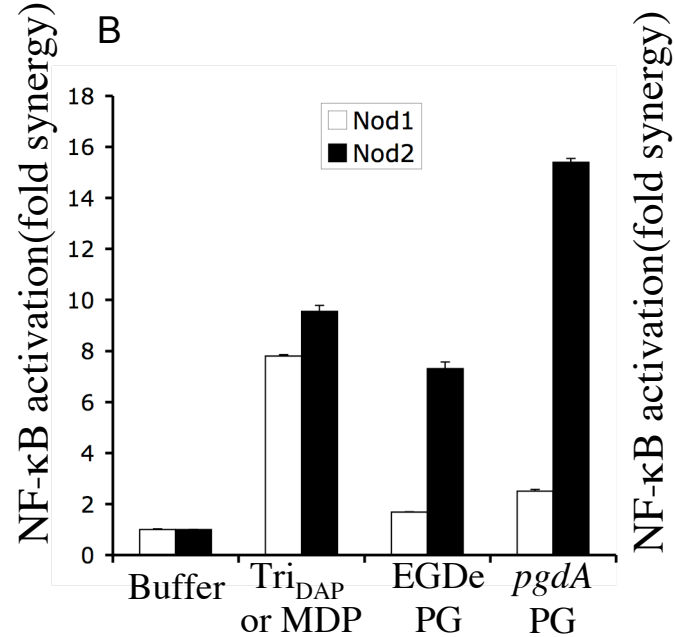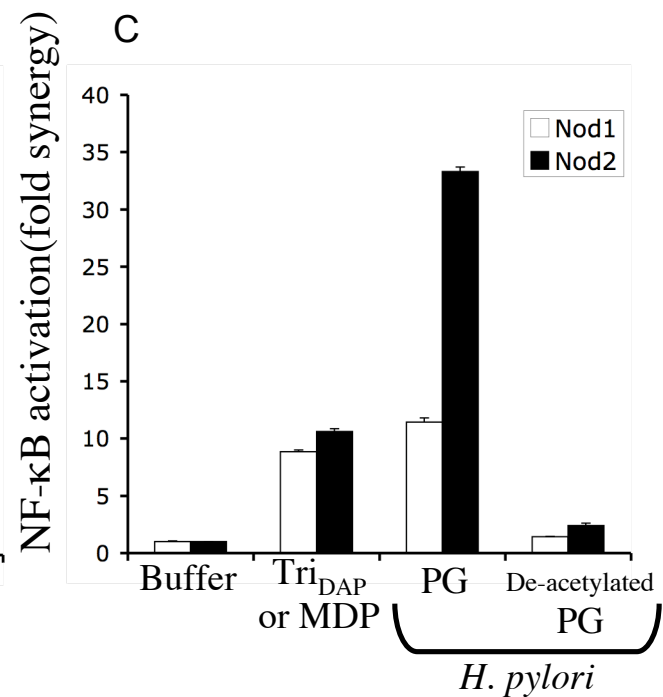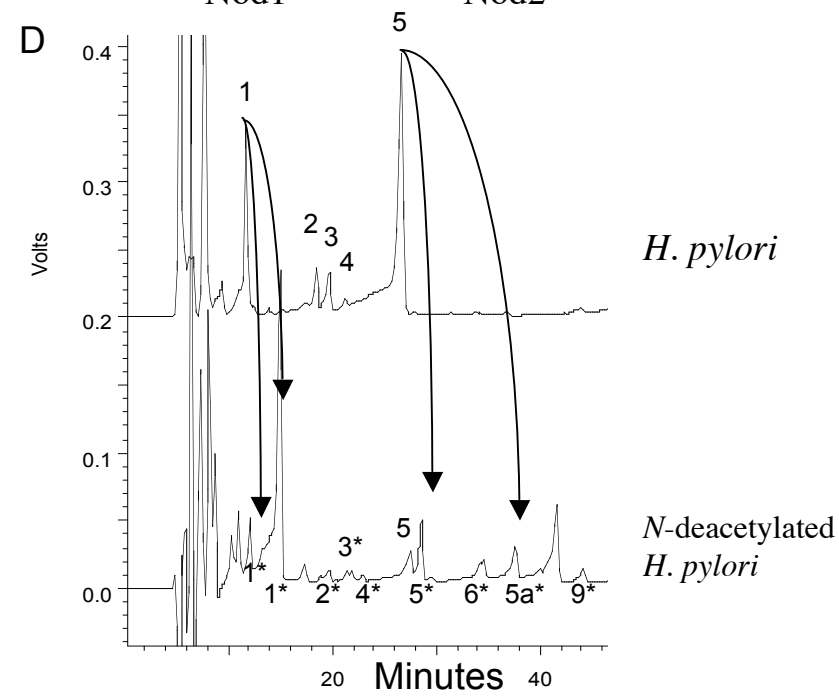

| Peak no. | [M+Na] <sup>+,a</sup> | Proposed structure <sup>b</sup>                 |
|----------|-----------------------|-------------------------------------------------|
| 1        | 893,3479              | GlcNAc-MurNAc-Ala-Glu- <i>m</i> Dap             |
| 2        | 964,4356              | GlcNAc-MurNAc-Ala-Glu- <i>m</i> Dap-Ala         |
| 3        | 1021,4159             | GlcNAc-MurNAc-Ala-Glu- <i>m</i> Dap-Ala-Gly     |
| 4        | 721,2981              | GlcNAc-MurNAc-Ala-Glu                           |
| 5        | 1035,4398             | GlcNAc-MurNAc-Ala-Glu- <i>m</i> Dap-Ala-Ala     |
| 1*       | 851,3619              | GlcN-MurNAc-Ala-Glu- <i>m</i> Dap               |
| 1a*      | 851,3745              | GlcN-MurNAc-Ala-Glu- <i>m</i> Dap               |
| 2*       | 922,3697              | GlcN-MurNAc-Ala-Glu- <i>m</i> Dap-Ala           |
| 3*       | 979,4075              | GlcN-MurNAc-Ala-Glu- <i>m</i> Dap-Ala-Gly       |
| 4*       | 679,2736              | GlcN-MurNAc-Ala-Glu                             |
| 5*       | 993,4572              | GlcN-MurNAc-Ala-Glu- <i>m</i> Dap-Ala-Ala       |
| 5a*      | 993,4518              | GlcN-MurNAc-Ala-Glu- <i>m</i> Dap-Ala-Ala       |
| 6*       | 902,3679              | GlcN-[(an)MurNAc]-Ala-Glu- <i>m</i> Dap-Ala     |
| 9*       | 973,4416              | GlcN-[(an)MurNAc]-Ala-Glu- <i>m</i> Dap-Ala-Ala |

<sup>a</sup> Molecular masses were measured by MALDI-TOF. DeN-acetylation of the N-acetylglucosamine residue was confirmed by MALDI-PSD.

<sup>b</sup> Abbreviations; GlcNAc, N-acetylglucosamine; MurNAc, N-acetylmuramic acid; GlcN, glucosamine; (an)MurNAc, (1-6)anhydro-N-acetylmuramic acid; Ala, alanine; Glu, glutamic acid; *m*Dap, meso-diaminopimelic acid; Gly, glycine
