# Supplementary material
Source: PubMed Central journal article supplement (PMC1783428)

A

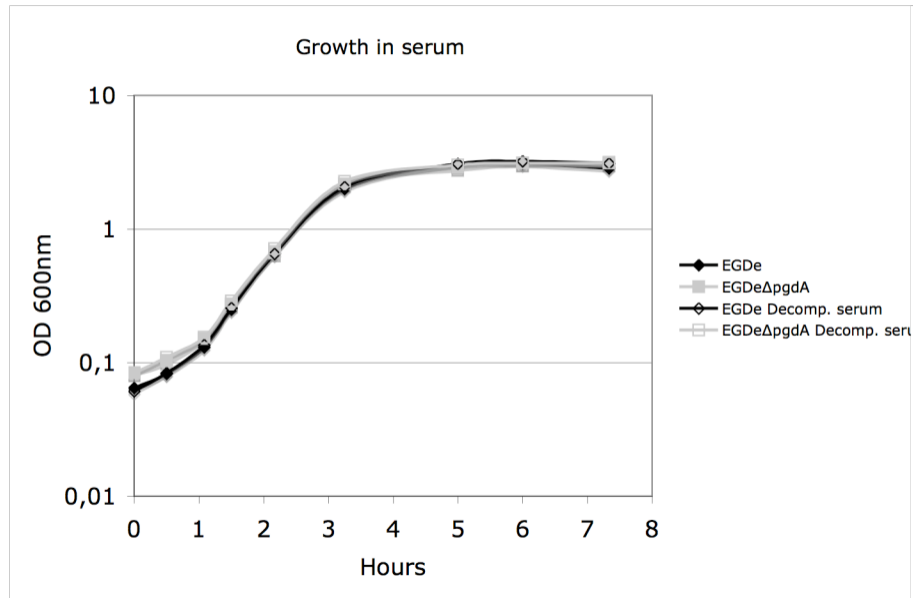

B

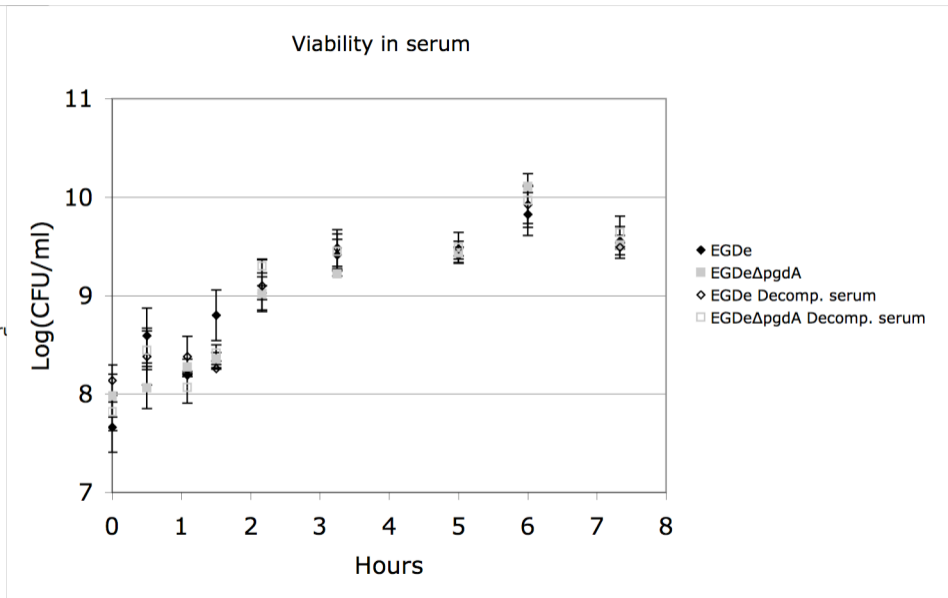

Supplement: pnas_0609672104_1.pdf [file pnas_0609672104_1.pdf]

**A**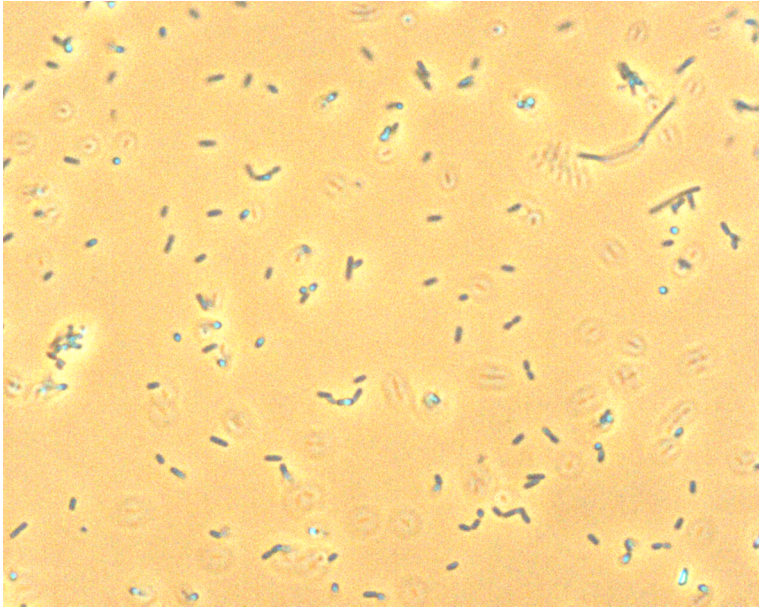**B**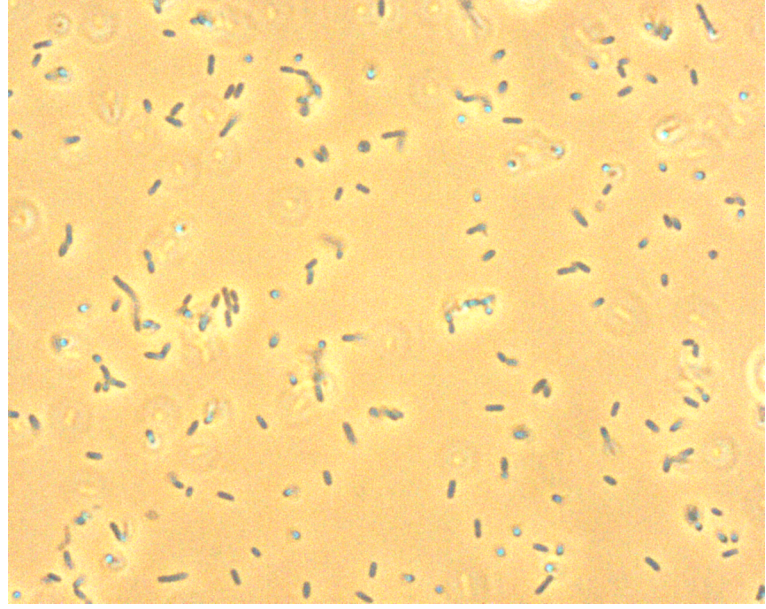**C**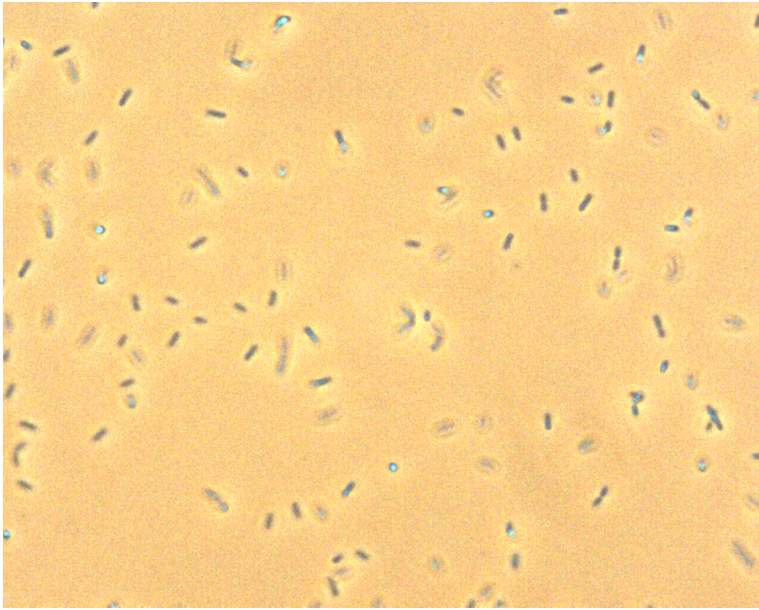**D**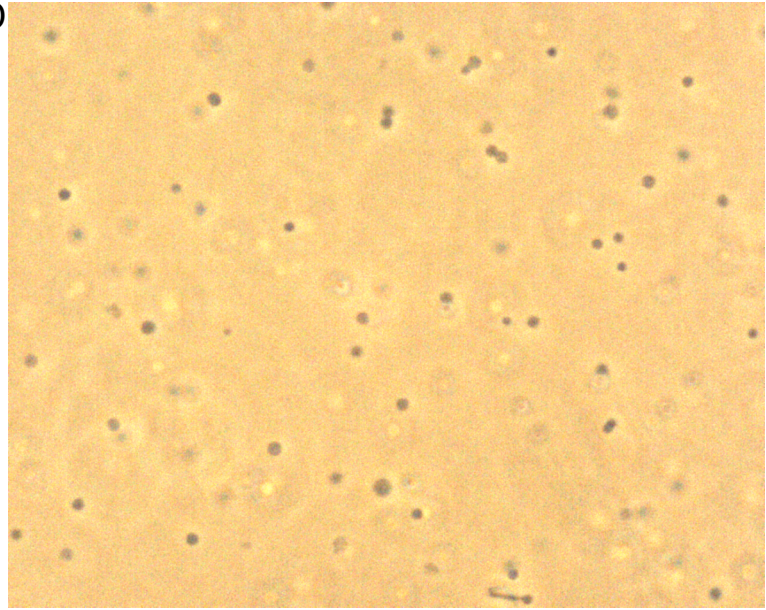

Supplement: pnas_0609672104_2.pdf [file pnas_0609672104_2.pdf]

A

TNF- $\alpha$ EGDe $\Delta$ pgdA EGDe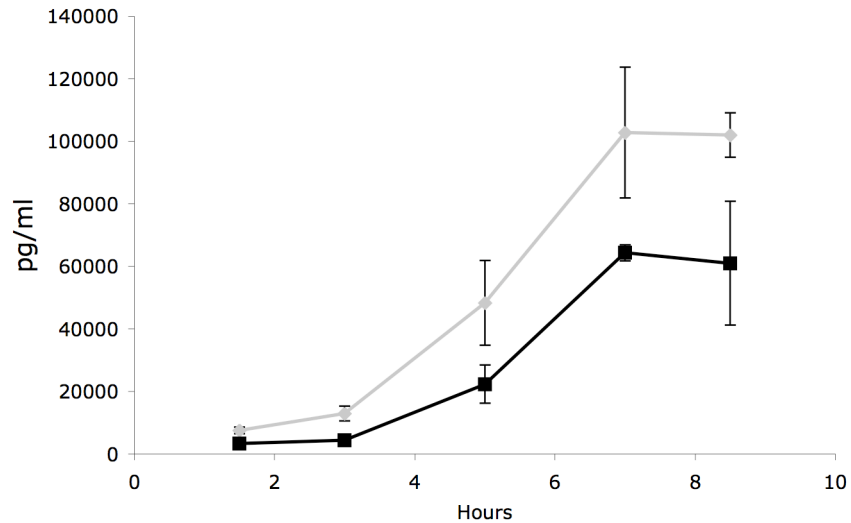

B

IL-1 $\beta$ EGDe $\Delta$ pgdA EGDe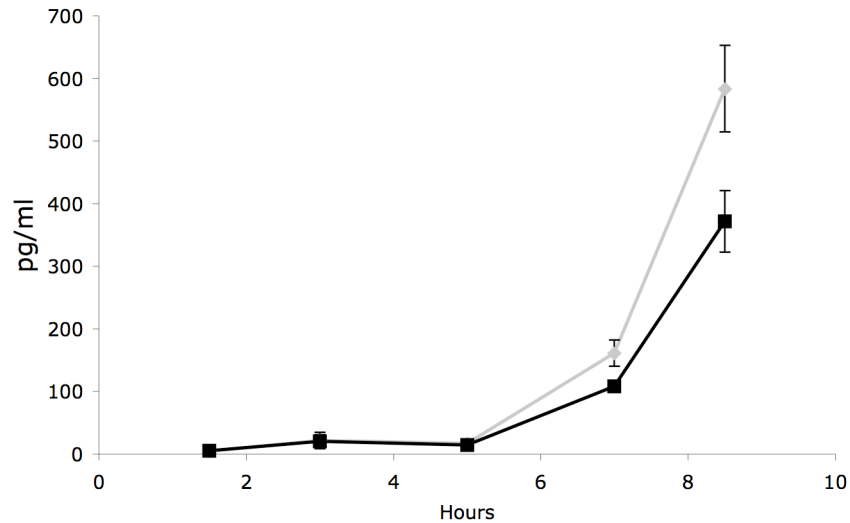

Supplement: pnas_0609672104_4.pdf [file pnas_0609672104_4.pdf]

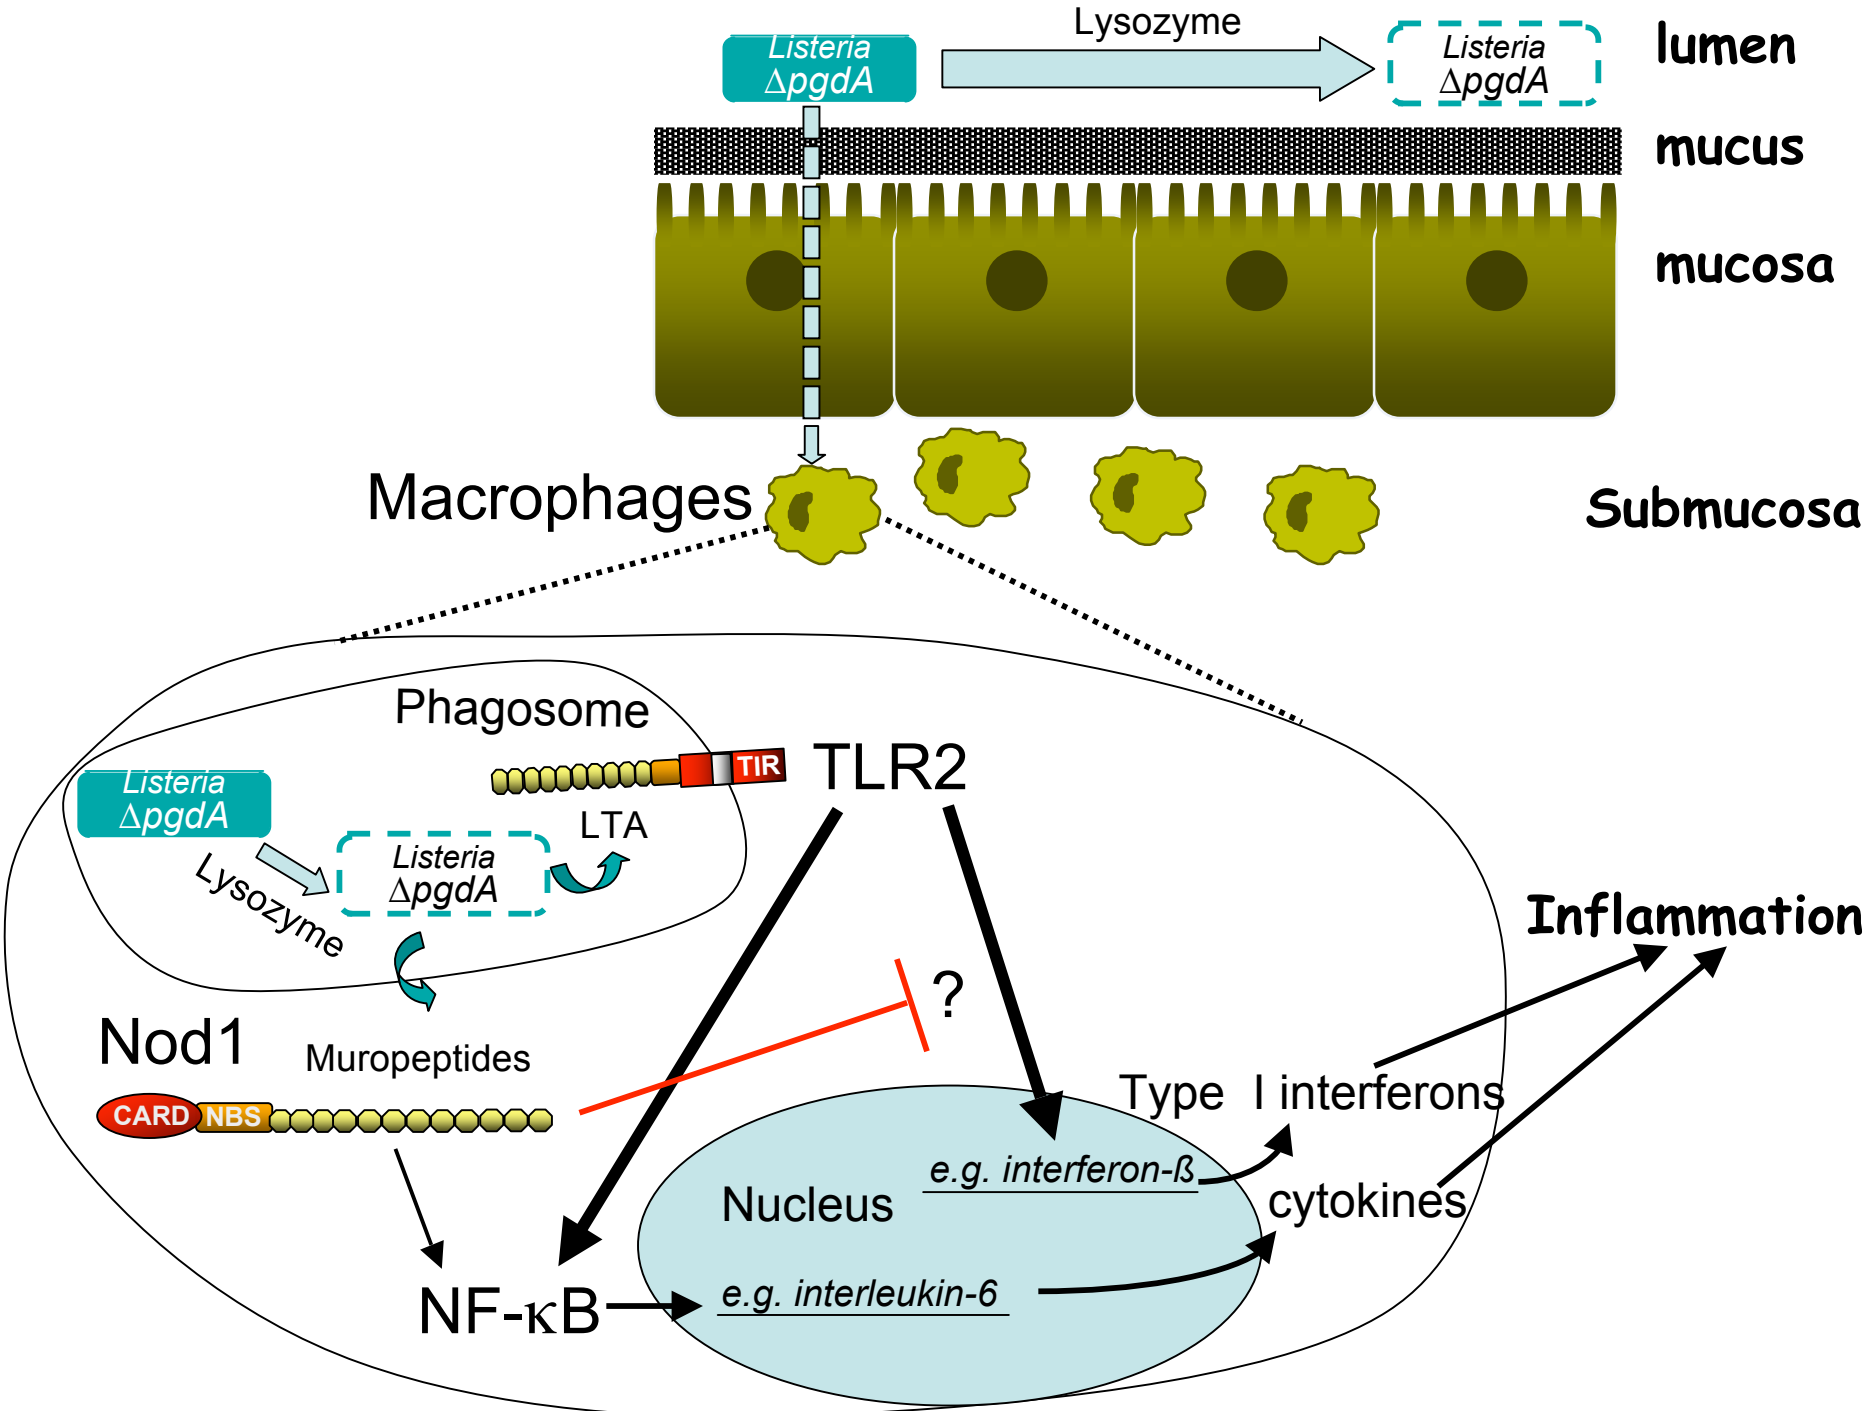

Supplement: pnas_0609672104_5.pdf [file pnas_0609672104_5.pdf]
